# Supplementary material for: 8-Hydroxyquinoline platinum(ii) loaded nanostructured lipid carriers: synthesis, physicochemical characterization and evaluation of antitumor activity
Source: Royal Society of Chemistry journal article supplement (doi:10.1039/d0nj03940c), 2020-12-10
Supplement: d0nj03940c1.pdf [file d0nj03940c1.pdf]

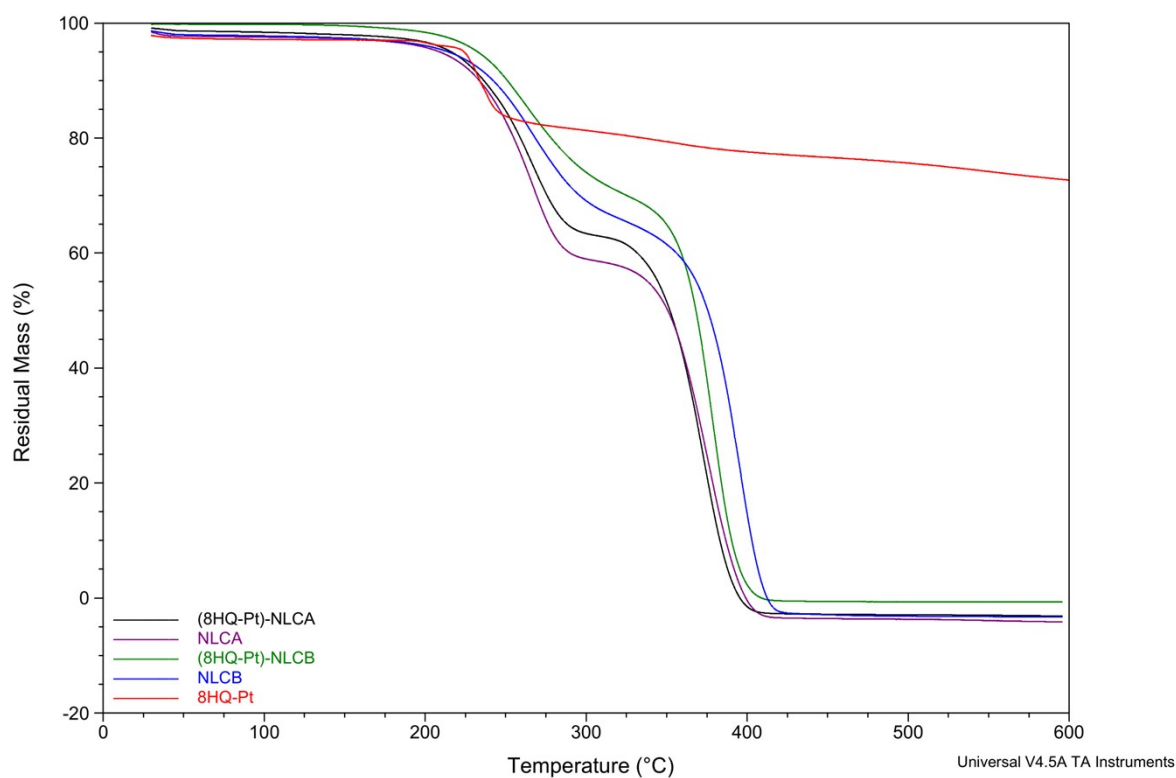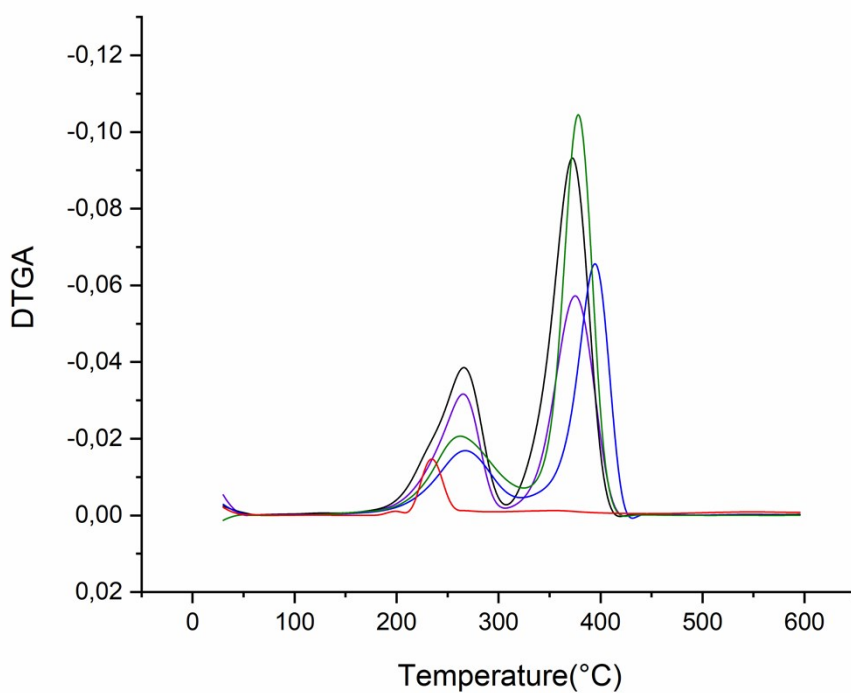

**Figure SM1:** Thermogravimetric curves and derived thermogravimetric curves (DTGA), of 8HQ-Pt compound, NLC<sub>A</sub>, (8HQ-Pt)-NLC<sub>A</sub>, NLC<sub>B</sub> and (8HQ-Pt)-NLC<sub>B</sub> nanoparticles.

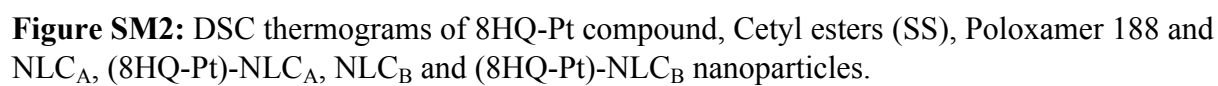

**Figure SM2:** DSC thermograms of 8HQ-Pt compound, Cetyl esters (SS), Poloxamer 188 and NLC<sub>A</sub>, (8HQ-Pt)-NLC<sub>A</sub>, NLC<sub>B</sub> and (8HQ-Pt)-NLC<sub>B</sub> nanoparticles.
